# Supplementary material for: Circulating miRNAs in girls with abdominal obesity: miR‐221‐3p as a biomarker of response to weight loss interventions
Source: PubMed Central journal article supplement — Pediatr Obes. 2022 Mar 15;17(8):e12910. doi: 10.1111/ijpo.12910 (PMC9539627; doi:10.1111/ijpo.12910), 2022-03-15
Supplement: IJPO-17-e12910-s001.pdf [file IJPO-17-e12910-s001.pdf]

**Circulating microRNAs in girls with abdominal obesity: miR-221-3p as a biomarker of response to weight loss interventions.**

**Ana Ojeda-Rodríguez<sup>1,2,†</sup>, Taís Silveira Assmann<sup>1,†</sup>, Lucia Alonso-Pedrero<sup>1,2</sup>, Maria Cristina Azcona-Sanjulian<sup>2,3</sup>, Fermín I. Milagro<sup>1,4,5</sup>, Amelia Marti<sup>1,2,5,\*</sup>**

<sup>1</sup> Department of Nutrition, Food Sciences and Physiology, University of Navarra. C/ Irunlarrea, 1. 31008 Pamplona, Spain.

<sup>2</sup> IdiSNA, Instituto de Investigación Sanitaria de Navarra. C/Irunlarrea, 3. 31008 Pamplona, Spain.

<sup>3</sup> Pediatric Endocrinology Unit, Department of Pediatrics, Clínica Universidad de Navarra. C/ Pío XII, 36. 31008. Pamplona, Spain.

<sup>4</sup> Center for Nutrition Research, University of Navarra. C/ Irunlarrea, 1. 31008 Pamplona, Spain

<sup>5</sup> Centro de Investigación Biomédica en Red de la Fisiopatología de la Obesidad y Nutrición (CIBERObn), Physiopathology of Obesity and Nutrition, Institute of Health Carlos III. Av. Monforte de Lemos, 3-5. 28029 Madrid, Spain

† A.O.R and T.S.A. contributed equally to this work.

\***Correspondence:** amarti@unav.es (A.M.); Tel: +34-948-425600; Fax: + 34-948-425-649.

### Supplementary Figure 1. Flowchart of intervention

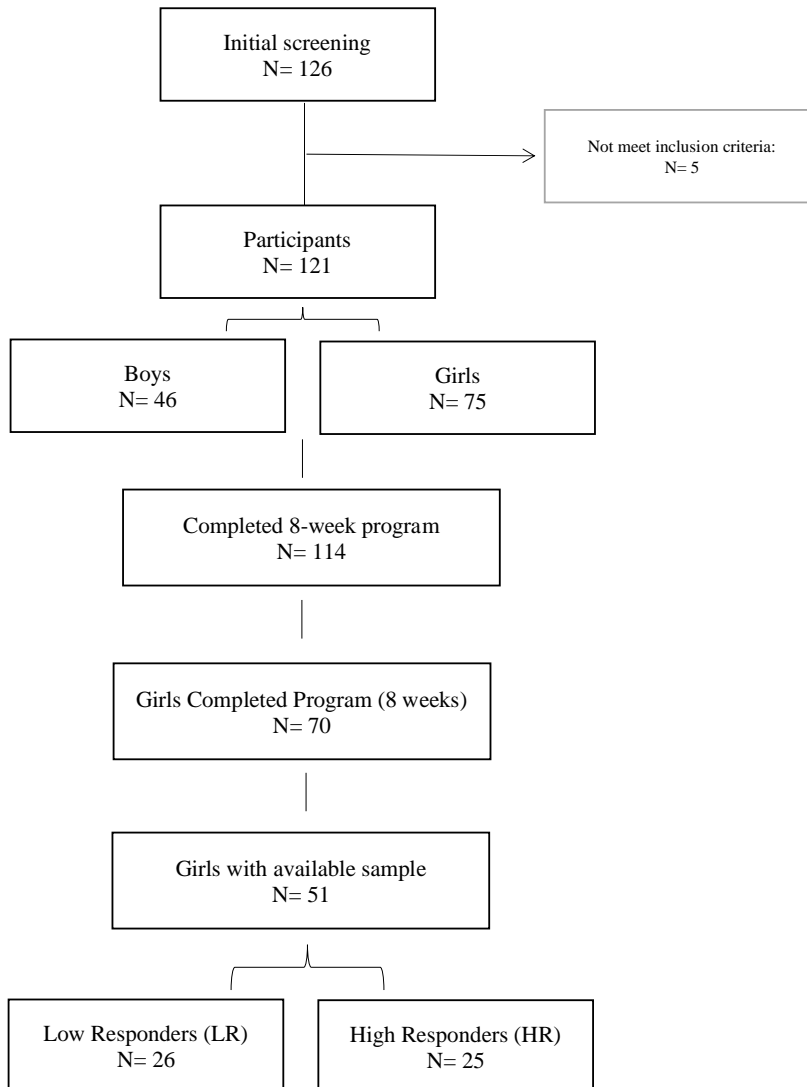

**Supplementary table 1.** Sequence of 48 included microRNAs

| <b>MiRCurry Assay cat. no.</b> | <b>miRNA ID</b> | <b>Target sequence</b>    |
|--------------------------------|-----------------|---------------------------|
| YP00204144                     | hsa-miR-200b-5p | CAUCUUACUGGGCAGCAUUGGA    |
| YP00204029                     | hsa-miR-519e-5p | UUCUCCAAAAGGGAGCACUUUC    |
| YP00204353                     | hsa-miR-758-3p  | UUUGUGACCUUGUCCACUAACC    |
| YP00204032                     | hsa-miR-221-5p  | ACCUGGCAUACAAUGUAGAUUU    |
| YP00205579                     | hsa-miR-935     | CCAGUUACCGCUUCCGCUACCGC   |
| YP00204107                     | hsa-miR-486-3p  | CGGGGCAGCUCAGUACAGGAU     |
| YP00204333                     | hsa-miR-210-3p  | CUGUGCGUGUGACAGCGGCUGA    |
| YP00204001                     | hsa-miR-486-5p  | UCCUGUACUGAGCUGCCCCGAG    |
| YP00204063                     | hsa-miR-103a-3p | AGCAGCAUUGUACAGGGCUAUGA   |
| YP00204532                     | hsa-miR-221-3p  | AGCUACAUUGUCUGCUGGGUUUC   |
| YP00204317                     | hsa-miR-130b-3p | CAGUGCAAUGAUGAAAGGGCAU    |
| YP00204783                     | hsa-miR-30c-5p  | UGUAAACAUCUACACUCUCAGC    |
| YP00204772                     | hsa-miR-23a-3p  | AUCACAUUGCCAGGGAUUUUC     |
| YP00204658                     | hsa-miR-130a-3p | CAGUGCAAUGUUAAAAGGGCAU    |
| YP00204227                     | hsa-miR-126-3p  | UCGUACCGUGAGUAAUAAUGCG    |
| YP00204339                     | hsa-miR-125a-5p | UCCUGAGACCCUUUAACCUUGUGA  |
| YP00205664                     | hsa-miR-122-5p  | UGGAGUGUGACAAUGGUGUUUG    |
| YP00205713                     | hsa-miR-125b-5p | UCCUGAGACCCUAACUUGUGA     |
| YP00206038                     | hsa-miR-27a-3p  | UUCACAGUGGCUAAGUUCGCG     |
| YP02101898                     | hsa-miR-519d-5p | CCUCCAAAGGGAAGCGCUUUCUGUU |
| YP00204754                     | hsa-miR-144-3p  | UACAGUAUAGAUGAUGUACU      |
| YP00204679                     | hsa-miR-29b-3p  | UAGCACCAUUUGAAAUCAGUGUU   |
| YP00204696                     | hsa-miR-572     | GUCCGCUCGGCGGUGGCCCA      |
| YP00204230                     | hsa-miR-21-5p   | UAGCUUAUCAGACUGAUGUUGA    |
| YP00204243                     | hsa-miR-15b-5p  | UAGCAGCACAUCAUGGUUUACA    |
| YP00204362                     | hsa-miR-375     | UUUGUUCGUUCGGCUCGCGUGA    |
| YP00204551                     | hsa-miR-222-3p  | AGCUACAUCUGGCUACUGGGU     |
| YP00205690                     | hsa-miR-33a-5p  | GUGCAUUGUAGUUGCAUUGCA     |
| YP00204688                     | hsa-miR-146a-5p | UGAGAACUGAAUCCAUGGGUU     |
| YP00206030                     | hsa-miR-183-5p  | UAUGGCACUGGUAGAAUUCACU    |
| YP00205860                     | hsa-miR-33b-5p  | GUGCAUUGCUGUUGCAUUGC      |
| YP00204358                     | hsa-miR-409-3p  | GAAUGUUGCUCGGUGAACCCCU    |
| YP00205915                     | hsa-miR-27b-3p  | UUCACAGUGGCUAAGUUCUGC     |
| YP00205986                     | hsa-miR-223-3p  | UGUCAGUUUGUCAAAUACCCCA    |
| YP00204529                     | hsa-miR-223-5p  | CGUGUAUUUGACAAGCUGAGUU    |
| YP00205918                     | hsa-miR-424-3p  | CAAAACGUGAGGCGCUGCUAU     |
| YP00206078                     | hsa-miR-138-5p  | AGCUGGUGUUGUGAAUCAGGCCG   |
| YP00204468                     | hsa-miR-107     | AGCAGCAUUGUACAGGGCUAUCA   |
| YP00204606                     | hsa-miR-22-3p   | AAGCUGCCAGUUGAAGAACUGU    |
| YP00204729                     | hsa-miR-29c-3p  | UAGCACCAUUUGAAAUCGGUUA    |
| YP02119305                     | hsa-miR-451a    | AAACCGUUACCAUUACUGAGUU    |
| YP00203952                     | cel-miR-39-3p   | UCACCGGGUGUAAAUCAGCUUG    |
| UniSp5                         |                 |                           |
| UniSp3                         |                 |                           |
| Blank                          |                 |                           |
